# Supplementary material for: Characterization of New Small-Spored Alternaria Species Isolated from Solanaceae in Algeria
Source: MDPI journal article supplement (doi:10.3390/life11121291), 2021-11-24
Supplement: s1 [file s1]

## Supplementary Materials

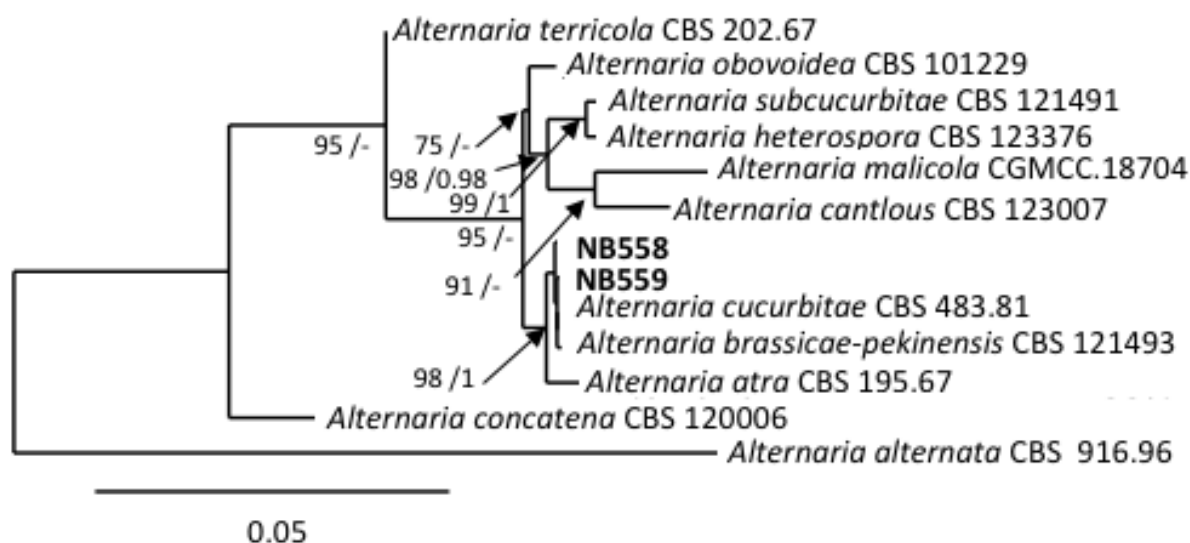

**Figure S1.** Phylogenetic tree reconstructed by the maximum likelihood method from the alignment of *gpd*, *tef1*, *rpb2*, *Alt a1* and *MAT1-2-1* of *Alternaria* isolates from section *Ulocladioides* for which these sequences are available. Bootstrap support values greater than 75% and Bayesian posterior probabilities greater than 0.95 are indicated near nodes. The GenBank acc. no. of sequences of the strains included as references were retrieved from [1].

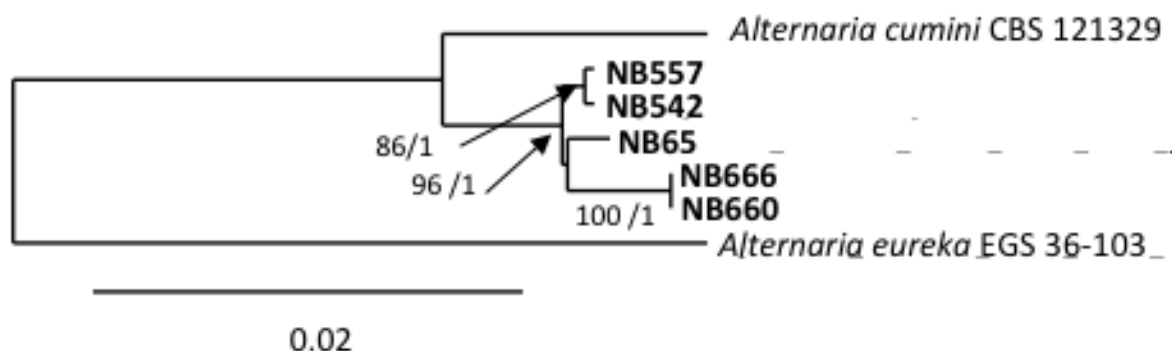

**Figure S2:** Phylogenetic tree reconstructed by the maximum likelihood method from the alignment of *ATPase*, *Act*, *Alt a1* of *Alternaria* isolates from section *Eureka*. Bootstrap support values greater than 75% and Bayesian posterior probabilities greater than 0.95 are indicated near nodes. The GenBank acc. nos. of sequences of the *Alternaria eureka* strain were retrieved from [2]. Acc. nos. of *Act* for *A. cuminicola* sp. nov. isolates are: MK940320 (NB65), OK35889 (NB542), OK358898 (NB557), OK358899 (NB660), OK358900 (NB666). The nucleotide sequences of *ATPase*, *Act* and *Alt a1* for the type strain of *Alternaria cumini* (CBS 121329) were obtained during the present study and are referred in GenBank under the following acc. nos.: OK358913, OK358901 and OK358906, respectively.

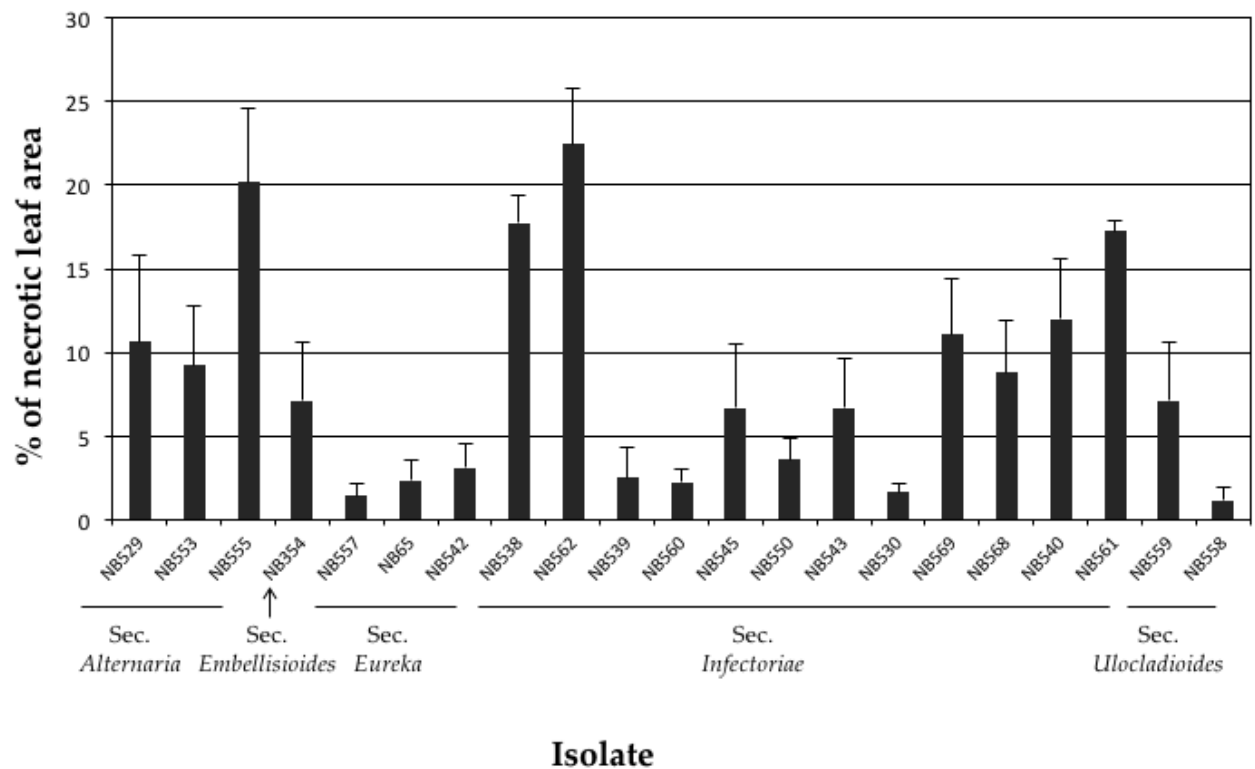

**Figure S3.** Pathogenicity testing of *Alternaria* isolates on *Solanum tuberosum* var. Désirée. Percentage of leaf necrotic area recorded at 21 DAI on plants inoculated with 18 *Alternaria* isolates plus 3 strains from section *Alternaria* (NB529, NB553, NB555).

#### Reference

1. Dang, J.L.; Gleason, M.L.; Li, L.N.; Wang, C.; Niu, C.K.; Zhang, R.; Sun, G.Y. *Alternaria malicola* sp. nov., a New Pathogen Causing Fruit Spot on Apple in China. *Plant Dis.* **2018**, *102*, 1273–1282.
2. Lawrence, D.P.; Gannibal, P.B.; Peever, T.L.; Pryor, B.M. The sections of *Alternaria*: Formalizing species-group concepts. *Mycologia* **2013**, *105*, 530–546. <https://doi.org/10.3852/12-249>.
